1 **The compact genome of *Giardia muris* reveals important**  
2 **steps in the evolution of intestinal protozoan parasites**

3

4 **Feifei Xu<sup>1</sup>, Alejandro Jiménez-González<sup>1</sup>, Elin Einarsson<sup>1,&</sup>, Ásgeir Ástvaldsson<sup>1</sup>,**  
5 **Dimitra Peirasmaki<sup>1</sup>, Lars Eckmann<sup>2</sup>, Jan O. Andersson<sup>1</sup>, Staffan G. Svärd<sup>1</sup>, Jon**  
6 **Jerlström-Hultqvist<sup>3,#</sup>**

7 <sup>1</sup>Department of Cell and Molecular Biology, BMC, Box 596, Uppsala University,  
8 SE-751 24 Uppsala, Sweden

9 <sup>2</sup>Department of Medicine, University of California, San Diego, La Jolla, California,  
10 USA

11 <sup>3</sup>Department of Biochemistry and Molecular Biology, Dalhousie University, Halifax,  
12 Canada

13 <sup>&</sup>Current address: Department of Biochemistry, University of Cambridge, Cambridge,  
14 England

15

16 # Corresponding author: Dr. Jon Jerlström-Hultqvist

17 Department of Biochemistry and Molecular Biology

18 Sir Charles Tupper Medical Building

19 5850 College Street

20 Halifax NS Canada

21 B3H 4R2

22

23

24 Tel.: +1 902-494-2881; Fax: +1 902-494-1355

25 *E-mail adress:* jon.jerlstromhultqvist@dal.ca

26

27 **Running title:** Streamlined *Giardia* genome

28 **Key words:** parasite, diplomonad, *Giardia*, streamlined, intestinal colonization,

29 evolutionary biology, horizontal gene transfer, antigenic variation

30

31

## 32 **Abstract**

33 Diplomonad parasites of the genus *Giardia* have adapted to colonizing different hosts,  
34 most notably the intestinal tract of mammals. The human-pathogenic *Giardia* species,  
35 *Giardia intestinalis*, has been extensively studied at the genome and gene expression  
36 level, but no such information is available for other *Giardia* species. Comparative data  
37 would be particularly valuable for *Giardia muris*, which colonizes mice and is commonly  
38 used as a prototypic *in vivo* model for investigating host responses to intestinal parasitic  
39 infection. Here we report the draft-genome of *G. muris*. We discovered a highly  
40 streamlined genome, amongst the most densely encoded ever described for a nuclear  
41 eukaryotic genome. *G. muris* and *G. intestinalis* share many known or predicted virulence  
42 factors, including cysteine proteases and a large repertoire of cysteine-rich surface  
43 proteins involved in antigenic variation. Different to *G. intestinalis*, *G. muris* maintains  
44 tandem arrays of pseudogenized surface antigens at the telomeres, whereas intact surface  
45 antigens are present centrally in the chromosomes. The two classes of surface antigens  
46 engage in genetic exchange. Reconstruction of metabolic pathways from the *G. muris*  
47 genome suggest significant metabolic differences to *G. intestinalis*. Additionally, *G.*  
48 *muris* encodes proteins that might be used to modulate the prokaryotic microbiota. The  
49 responsible genes have been introduced in the *Giardia* genus via lateral gene transfer  
50 from prokaryotic sources. Our findings point to important evolutionary steps in the  
51 *Giardia* genus as it adapted to different hosts and it provides a powerful foundation for  
52 mechanistic exploration of host-pathogen interaction in the *G. muris* – mouse  
53 pathosystem.

## 54 **Importance**

55 The *Giardia* genus comprises eukaryotic single-celled parasites that infect many  
56 animals. The *Giardia intestinalis* species complex, which can colonize and cause

57 diarrheal disease in humans and different animal hosts has been extensively explored  
58 at the genomic and cell biologic levels. Other *Giardia* species, such as the mouse  
59 parasite *Giardia muris*, have remained uncharacterized at the genomic level,  
60 hampering our understanding of *in vivo* host-pathogen interactions and the impact of  
61 host dependence on the evolution of the *Giardia* genus. We discovered that the *G.*  
62 *muris* genome encodes many of the same virulence factors as *G. intestinalis*. The *G.*  
63 *muris* genome has undergone genome contraction, potentially in response to a more  
64 defined infective niche in the murine host. We describe differences in metabolic and  
65 microbiome modulatory gene repertoire, mediated mainly by lateral gene transfer, that  
66 could be important for understanding infective success across the *Giardia* genus. Our  
67 findings provide new insights for the use of *G. muris* as a powerful model for  
68 exploring host-pathogen interactions in giardiasis.  
69

## 70 **Background**

71 Many eukaryotes have evolved from free-living to parasitic lifestyles over  
72 evolutionary time, yet parasitism has developed independently in different taxonomic  
73 groups and is therefore characterized by many unique features<sup>1,2</sup>. Comparative  
74 genomics provides an opportunity to investigate the factors of parasitism such as loss  
75 of morphological, metabolic and genomic complexity, and consequently reduced  
76 evolutionary potential for a free-living lifestyle<sup>2</sup>. It can also identify the drivers and  
77 consequences of a parasitic lifestyle and generate new testable ecological and  
78 evolutionary hypotheses<sup>3</sup>.

79 *Giardia* is a protozoan parasite that non-invasively colonizes the intestinal  
80 tract of many vertebrates. The human pathogen, *Giardia intestinalis*, is estimated to  
81 cause 300 million cases of giardiasis in the world each year, being a major cause of  
82 diarrheal disease<sup>4</sup>. Giardiasis is also a problem in domestic animals, and the zoonotic  
83 potential of *Giardia* has been highlighted in recent years<sup>5</sup>. *In vitro* models of the  
84 interaction of *G. intestinalis* with human cells have helped to unravel clues to how  
85 *Giardia* causes disease<sup>6-8</sup>, such as the importance of, the adhesive disc for  
86 attachment<sup>9</sup>, flagella for motility<sup>10,11</sup>, secreted cysteine proteases for interference with  
87 host defenses<sup>12-16</sup>, interactions with the intestinal microbiota<sup>6,17</sup>, differentiation into  
88 cysts for transmission<sup>4,18</sup> and interference with nitric oxide (NO) production<sup>19,20</sup>.  
89 Despite this progress it remains uncertain whether these *in vitro* models are  
90 representative of the natural infection, particularly because animal models of *G.*  
91 *intestinalis* infection have significant limitations. For example, infection of mice, the  
92 most commonly used laboratory animals, with human *G. intestinalis* isolates is  
93 unreliable and requires manipulations such as antibiotic conditioning<sup>6</sup>. *Giardia muris*,  
94 one of six recognized species of *Giardia*<sup>21</sup>, has been used as a mouse model since the

1960s for exploring the pathogenesis and immunological responses of the mammalian host to infection<sup>22</sup>. The availability of knock-out mice and other host-related resources makes *G. muris* a powerful model to investigate host-pathogen interactions<sup>6</sup>. The life cycle and infective process of *G. muris* is closely related to infection by *G. intestinalis*<sup>23</sup>. Major findings in *Giardia* biology such as flagellar and disc function, cellular differentiation<sup>22,24,25</sup>, and immunity<sup>23,26–29</sup> have been pioneered with *G. muris*, and later been shown to be transferable to human *G. intestinalis* infections<sup>29,30</sup>. Unfortunately, research on *G. muris* has been hampered by the lack of genome information and gene expression data<sup>5</sup>.

Here we describe the draft genome of *G. muris*, representing the first genome of any *Giardia* outside of the *G. intestinalis* species complex. We performed comparative genomics with free-living (*Kipferlia bialata*<sup>31</sup>) and parasitic (*G. intestinalis*<sup>32–34</sup> and *S. salmonicida*<sup>35</sup>) relatives to *G. muris* to determine how *G. muris* may have evolved into an intestinal pathogen of rodents.

## 110 **Results**

### 111 **Genome assembly**

We extracted DNA from freshly excysted *G. muris* cysts purified from the feces of infected mice (Fig. S1A) and assembled a high-quality draft genome using sequences obtained by PacBio and Illumina technologies. In addition, we generated RNA-Seq data for gene prediction and gene expression analyses with total RNA extracted from cysts, recently excysted cells (excystozoites), and trophozoites isolated from the small intestine of infected mice (Fig. S1A).

The *G. muris* draft genome consists of 59 contigs spanning 9.8 Mbp, which is notably smaller than the *G. intestinalis* WB genome (12.6 Mbp, Table 1). Most of the

120 genome (9.0 Mbp, 92%) is found on five contigs (>1 Mbp). Of the remaining short  
121 contigs (<30 kbp), ten are terminated in telomeric repeats (TAGGG), suggesting they  
122 are the terminal points of five chromosomes. The karyotype of *G. muris* was  
123 previously shown to consist of four separable chromosomes<sup>36</sup>. We hypothesize that  
124 our five major contigs represent a total of five chromosomes in *G. muris*, two of  
125 which are so close in size (1.290 and 1.297 Mbp) that they were not readily resolved  
126 using pulsed-field gels, and are named accordingly from 1 to 5 from largest to  
127 smallest in size (Fig. 1). 42 of the 44 small contigs contain ribosomal DNA (rDNA)  
128 clusters that encode 28S, 18S, and 5.8S rRNAs. In fact, rDNA clusters make up 2.0%  
129 of the total genome, and account for 91.6% of the identified repeats (Supplementary  
130 Methods). Half of the contigs terminated by telomeric repeats have adjacent rDNA  
131 clusters (Fig. S1B), suggesting that multiple of the *G. muris* chromosomes<sup>36</sup>, like  
132 those in *G. intestinalis*<sup>37</sup>, have long repeats of rDNAs close to the telomeres. In  
133 contrast to *G. intestinalis* chromosomes<sup>37</sup>, no retrotransposon sequences were found in  
134 the telomeric regions and overall very few retrotransposon sequences were detected in  
135 the *G. muris* genome.

136 Allelic sequence heterozygosity (ASH) in the assembly was estimated to be  
137 0.016% (Table 1), equivalent to the low level found in the *G. intestinalis* WB genome  
138 (0.026%, Table 1). Distribution of ASH along chromosomes showed only weak  
139 clustering in certain areas, particularly at the ends of chromosomes (Fig. 1).

140

#### 141 **Genome streamlining and synteny**

142 Gene prediction and manually curated annotation identified 4653 protein coding  
143 genes in *G. muris* (Table 1). This makes 84.5% of the genome coding, counting also the  
144 tRNAs and rRNAs (Table 1). Thus, the *G. muris* genome is an example of a very compact

145 eukaryotic genome. Consistent with that, the average intergenic size is 264 bp (Table 1),  
146 with a prominent skew towards shorter intergenic regions for a high proportion of genes  
147 (median size at 37 bp, Fig. 2C). The compactness of the genome is also illustrated by  
148 multiple instances of overlapping genes, with 441 genes (9.5% of all genes) showing an  
149 average overlapping size of 21 bp (spanning 1-327 bp) with neighboring genes.

150 The *G. muris* and the new improved *G. intestinalis* WB genome  
151 (AACB03000000, F. Xu and S.G. Svärd) do not maintain clear chromosomal synteny  
152 even though both are assembled as five near-complete chromosomes (Fig. S2).  
153 However, local synteny (Fig. 2AB) was obtained among 3,043 one-to-one orthologs  
154 (Table S1A) (an average amino acid similarity of 44.7%) shared by the two genomes.  
155 Comparing local synteny, it becomes obvious that *G. muris* keeps shorter orthologous  
156 gene and intergenic region sizes (Fig. 2BCD).

### 157 **Gene regulation**

158 We could not identify any universal, conserved promoter motifs shared by all  
159 *G. muris* genes except for an enrichment of A residues around the start codon (Fig.  
160 S3A), which resembles observations in *G. intestinalis*<sup>38</sup>. The streamlining of the *G.*  
161 *muris* genome was also apparent at the 3' end of genes where the putative  
162 polyadenylation signal, which is similar to the one described in *G. intestinalis*<sup>38</sup>, is  
163 overlapping with the stop codon for most genes (Fig. S3B). Genes up-regulated early  
164 during encystation in *G. intestinalis* have specific promoter elements<sup>39,40</sup>. Most of  
165 these genes were also identified in *G. muris*, with one notable exception of cyst-wall  
166 protein 3 (Fig. 3C). Encystation-related genes in *G. muris* share promoter motifs (Fig.  
167 3A), similar to the Myb binding sites found in *G. intestinalis*<sup>40</sup>, suggesting a similar  
168 type of regulation. We also noted that the encystation-related genes are among the



169 most highly expressed genes in *G. muris* trophozoites *in vivo* (Fig. S3C, Table S1B),  
170 similar to *G. intestinalis* infection in mice<sup>41,42</sup>.

171 Very few genes in *G. intestinalis* contain introns, with only eight known *cis*-  
172 spliced and four *trans*-spliced genes (five *trans*-introns)<sup>43-45</sup>. Similarly, only three *cis*-  
173 and no *trans*-introns were identified in the parasitic diplomonad *S. salmonicida*<sup>35</sup>,  
174 whereas the free-living fornicate *K. bialata* has on average seven *cis*-introns per protein  
175 encoding gene<sup>31</sup>. *G. muris* maintains homologs to the eight *cis*-spliced *G. intestinalis*  
176 genes, but has only three retained introns (Fig. S4A). All four *trans*-spliced genes in *G.*  
177 *intestinalis* have homologs in *G. muris* with conserved splicing motifs (Fig. S4). Mining  
178 genes with similar motifs did not reveal additional intron-containing genes in *G. muris*.  
179 Similar to *G. intestinalis*<sup>43</sup> all the *trans*-spliced genes in *G. muris* preserve a similar  
180 cleavage motif TCCTTTACTCAA (Fig. S4C) as the RNA processing sequence motif<sup>43</sup>.  
181 Thus, we observe a reduction of introns in *G. muris*, and *cis*-introns seem to be easier to  
182 lose than *trans*-introns.

### 183 **VSPs and antigenic variation in *G. muris***

184 Variant specific-surface proteins (VSPs) in *G. intestinalis* are characterized as  
185 cysteine-rich proteins with frequent CXXC motifs and a conserved C-terminal  
186 transmembrane (TM) domain followed by a cytoplasmic pentapeptide (CRGKA, Fig.  
187 S5A). We identified 265 VSP homologs in *G. muris*. Their C-terminal pentapeptide  
188 (GCRGK, Fig. S5A, Table S1C) differed slightly from that in *G. intestinalis*. However,  
189 the cysteine and arginine residues in the pentapeptide, which are known to be post  
190 translationally modified in *G. intestinalis*, are conserved<sup>46,47</sup>. In addition, the preceding 24  
191 aa of the *G. muris* VSP TM domain show conservation to the TM domain of *G.*  
192 *intestinalis* VSPs (Fig. S5A). Most *G. muris* VSPs contain the conserved GGCY motif  
193 present in most *G. intestinalis* VSPs (Table S1C). Since *bona fide* VSPs need signal

194 peptides (SPs) at the N-terminus to guide VSPs to the parasite surface, we divided this  
195 group into two subgroups; proteins with predicted SPs are called VSPs, whereas VSP  
196 proteins without SPs are referred to as pseudogenized VSPs ( $\psi$ VSPs). The 26 complete  
197 VSP genes (16 unique at 98% identity to each other) are mostly located chromosome-  
198 centrally (Fig. 1, Table 3). Seven pairs of VSP genes were identified with identical  
199 sequences arranged either as head-to-head (2 pairs) or tail-to-tail (5 pairs) (Table 4).  
200 Sequences in between the different VSP pairs resemble NimA (never in mitosis gene a)-  
201 related kinase (NEKs), ankyrin repeat proteins (ARPs) and zinc-finger domains. There  
202 are also 4 copies of identical VSPs clustering close to the 3' end of chromosome 2 (Fig.  
203 2) with tandem repeats and sequences resembling NEKs and zinc-finger domains  
204 interspersed (Table 4).

205         In contrast to complete VSPs, most  $\psi$ VSPs (183 / 239) are found in linear  
206 arrays (n=17) in *G. muris*, herein defined as having >3  $\psi$ VSPs genes (Fig. S5BC).  
207 Strikingly, nine out of the ten ends of the main contigs have a  $\psi$ VSP array at or close  
208 to the ends of the chromosomes (telomere-adjacent) containing a total of 131 genes  
209 (Table S1C). The only main contig that ends without an array has a cluster of two  
210  $\psi$ VSPs close to the chromosome terminus. We found a single  $\psi$ VSP array consisting  
211 of 12 genes in a chromosome position that was non-telomere adjacent (on  
212 chromosome 5) (Fig. 1). The  $\psi$ VSP arrays vary in copy numbers (5-23 genes) and the  
213 terminal part of the  $\psi$ VSP array is always arranged with the tail-end towards the  
214 chromosome terminus. The tandem arrangement of the gene arrays suggested that  
215 they were generated by gene duplication. Two of the terminal arrays are scrambled  
216 and have a shift in the  $\psi$ VSP array directionality at the site of an intact VSP (Fig.  
217 S5B).

218 We constructed a phylogeny of all the VSPs and  $\psi$ VSPs in *G. muris* to  
219 investigate their evolutionary dynamics. The phylogeny revealed relaxed clustering of  
220  $\psi$ VSP genes originating in each linear array (Fig. S5C). However, the internal linear  
221 array on chromosome 5 represents a noteworthy exception showcasing a very recent  
222 gene duplication event. Interestingly, the great majority of full-length VSPs (23/28)  
223 are clustered in the phylogeny, including the VSPs in the scrambled  $\psi$ VSP arrays,  
224 despite these genes being distributed in physically separate chromosomal locations  
225 across all five primary scaffolds (Fig. S5C). The few non-clustered VSP genes in the  
226 phylogeny that are not part of pairs or clusters are found directly adjacent to  $\psi$ VSPs  
227 genes. The relaxed clustering of VSPs and  $\psi$ VSPs suggested that these genes might  
228 be undergoing periodical recombination or gene conversion.

229 The VSPs and  $\psi$ VSPs showed distinct expression patterns. Essentially all the  
230  $\psi$ VSP genes were non-transcribed in the three surveyed life-stages (Fig. S5D). VSPs, on  
231 the other hand, showed on average higher expression with one or a few loci displaying  
232 dominant expression in the different life-stages (Fig. S5D).

233 There is also another, less characterized VSP-related cysteine-rich protein family  
234 in *G. intestinalis*, High Cysteine Membrane Proteins (HCMPs)<sup>48</sup>, with 62 members<sup>32</sup>.  
235 Many are highly up-regulated during interaction with intestinal epithelial cells<sup>49</sup>. The  
236 HCMPs have several CXXC and CXC motifs, one VSP-like transmembrane domain but  
237 with longer C-terminals than in the VSPs<sup>49</sup>. The 34 genes matching these criteria in the *G.*  
238 *muris* genome were named HCMPs after the corresponding gene family in *G. intestinalis*.  
239 They are found spread-out on the five chromosomes (Fig. 1).

#### 240 **Multigene families in *G. muris***

241 The largest multigene families in *G. intestinalis* outside the VSPs and HCMPs are  
242 the NEKs<sup>50</sup> and ankyrin repeat containing proteins (Protein 21.1)<sup>32</sup>. There are 230 NEKs

243 in *G. muris* (Fig. 1, Table 4), making up 71% of its kinome, slightly more than what was  
244 found in *G. intestinalis*<sup>50</sup>. We classified ankyrin repeat containing proteins further into  
245 three groups. The ankyrin repeat protein-1 (ARP-1) with only ankyrin repeats, ARP-2  
246 with ankyrin repeats plus zinc finger domains, and ARP-3 with both ankyrin repeats plus  
247 domains other than zinc finger domains. The NEKs and the different classes of ARPs are  
248 scattered throughout the chromosomes without obvious clustering (Fig. 1). A  
249 phylogenetic analysis revealed that 79 of the NEKs are conserved as 1:1 orthologs  
250 between *G. muris* and *G. intestinalis* (Fig. S6A). Each species has one massively  
251 expanded cluster of NEKs with *G. muris* having the largest with 104 members and the  
252 one in *G. intestinalis* having 79 members. ARPs show a similar evolutionary stability  
253 with 132 conserved 1:1 orthologs between species (Fig. S6B). *G. muris* shows a major  
254 species-specific expansion of 91 genes whereas the largest expanded clusters in *G.*  
255 *intestinalis* amounts to two groups of 15 genes each. The partly shared domain-structure  
256 of NEKs and ARPs prompted us to investigate their relationship by a network analysis  
257 employing reciprocal blastp (1e-05 cutoff). The two groups are not recovered as clearly  
258 separated clusters but form partially overlapping networks, indicating that there might be  
259 recombination or gene conversion in between (Fig. S6C). The larger numbers of genes in  
260 these multigene families in *G. muris* compared to *G. intestinalis* and their evolutionary  
261 dynamics are intriguing given the otherwise streamlined features of the *G. muris* genome,  
262 perhaps suggesting that they have unique roles in adaptation to their murine hosts.

### 263 **Virulence factors in *Giardia***

264 *G. intestinalis* is not known to possess classical virulence factors, such as  
265 enterotoxins, but several genes are important for colonization of the host and thus for  
266 pathogenesis. These include genes for motility<sup>10</sup>, the adhesive disc for attachment<sup>9</sup>,  
267 secreted cysteine proteases that can degrade host defensive factors<sup>12,13</sup>, and cysteine-rich

268 surface protein like the VSPs<sup>51</sup> and the HCMPs<sup>48</sup> that undergo antigenic variation. The  
269 cytoskeletal protein repertoire in *G. muris* is very similar to *G. intestinalis* apart from  
270 several fragmented alpha-tubulins (3 complete genes with homologs in *G. intestinalis* and  
271 9 incomplete gene fragments). The adhesive disc is a unique cytoskeletal structure of  
272 *Giardia* parasites essential for attachment of the trophozoite in the small intestine, but is  
273 missing in other fornicates<sup>9</sup>. The first detailed studies of the adhesive disc were performed  
274 on *G. muris* trophozoites<sup>24</sup>, but more recent work has mostly focused on *G. intestinalis*.  
275 The vast majority (82 of 85) of *G. intestinalis* disc proteins<sup>9</sup> were also identified in *G.*  
276 *muris* (Table S1D); 12 were NEK kinases and 27 were ARP-1 proteins. Two of the three  
277 *G. intestinalis* disc proteins not found in *G. muris* (Table S1D) localize to a structure in  
278 the *G. intestinalis* disc on top of the ventral groove, but this structure is missing in the *G.*  
279 *muris* disc<sup>22</sup>, suggesting functional disc differences. Many of the disc proteins that are  
280 immunodominant during *G. intestinalis* infections (e.g. alpha-giardins, beta-giardin,  
281 SALP-1, alpha- and beta-tubulin<sup>52</sup> are highly expressed (here defined as >500 FPKM) in  
282 *G. muris* trophozoites in the small intestine (Table S1B).

283 Proteases are important virulence factors in many pathogens and cysteine-protease  
284 activities have been suggested to play a role in *Giardia* virulence<sup>4,13</sup>. We identified 81  
285 proteins classified as proteases in the *G. muris* genome, compared to 96 proteins  
286 identified in an identical search in *G. intestinalis* WB (Table S1E). The largest family of  
287 proteases in *G. muris*, with 15 members, are papain-like cysteine proteases (C1A family).  
288 This protein family is also the largest protease group in *G. intestinalis* with 21  
289 members<sup>53,54</sup>. Several conserved groups of proteases were found to have been present in  
290 the ancestor to *Giardia* and *Spironucleus*, although we also found evidence for lineage-  
291 specific gene loss and expansion in *G. muris* (Fig. S7). The most highly expressed

292 cysteine protease of *G. muris in vivo* is the closest homolog to the highest expressed  
293 protease in *G. intestinalis* WB<sup>54</sup>.

#### 294 **Metabolic pathways in *G. muris***

295 Our metabolic reconstruction identified 95 metabolic pathways in *G. muris*  
296 compared to 98 pathways detailed in *G. intestinalis* WB; four pathways were unique in *G.*  
297 *muris* and eight in *G. intestinalis* WB. Even though the overall metabolism is highly  
298 similar between *G. muris* and *G. intestinalis* WB, the genes for several specific enzymes  
299 and their putative reactions show distinct differences. Thus, 18 unique reactions (14  
300 enzymes) were predicted in *G. muris* and 25 in *G. intestinalis* WB (10 enzymes) (Table  
301 2). Several of these unique proteins showed moderate-high identity to prokaryotic  
302 proteins (Table S1F). Five of these prokaryote-like genes are present in the genome of  
303 assemblage B strain *G. intestinalis* GS.

304 The potential utilization of carbohydrate sources for glycolysis is different in *G.*  
305 *muris* compared to *G. intestinalis*. Fructokinase and mannose 6-phosphate isomerase  
306 enable *G. muris* to use fructose and mannose 6-phosphate unlike *G. intestinalis*. In both  
307 cases, the enzymes were acquired from bacteria via lateral gene transfer (Table S1F,  
308 Figure S8AB). Curiously, the *G. muris* gene for mannose 6-phosphate isomerase is found  
309 next to a bacterial transcriptional regulator/sugar kinase gene. Phylogenetic analyses  
310 show that *G. muris* mannose 6-phosphate isomerase and the transcriptional  
311 regulator/sugar kinase gene clusters deep in the Bacteroidetes group. This gene  
312 arrangement is observed in bacteria of the genus *Alistipes*, whose genomes harbor the  
313 most similar homologs, supporting the notion that a single event of lateral gene transfer  
314 best explains the origin of these genes in *G. muris* (Figure S8BC). Both genes have the A-  
315 rich initiator that precedes the start codon in most *G. muris* genes and are expressed in *G.*  
316 *muris* trophozoites (Table S1B).

317 The utilization of glycerol for ATP synthesis via glycerol kinase has been  
318 suggested in *G. intestinalis* upon depletion of primary carbon sources<sup>55</sup>. This enzyme is  
319 found in both *Spironucleus* and *Trichomonas* but has been lost in *G. muris*. Another  
320 notable metabolic difference to *G. intestinalis* WB is the lack of pyrophosphate-  
321 dependent pyruvate phosphate dikinase (PPDK) that leaves a single, less energy efficient,  
322 route from phosphoenol pyruvate to pyruvate via pyruvate kinase in *G. muris*.

323 *G. muris* is predicted to synthesize coenzyme A from pantothenate, employing a  
324 bifunctional phosphopantothenoyl decarboxylase-phosphopantothenate synthase. The  
325 same pathway is described in *S. salmonicida*<sup>35</sup>, but the complete pathway is missing in *G.*  
326 *intestinalis* (Table 2).

327 As in all other studied metamonads, *G. muris* encodes the arginine dihydrolase  
328 (ADH) pathway that enables the use of arginine as an energy source and at the same time,  
329 reduces the available free arginine in the environment, preventing nitric oxide (NO)  
330 production in host cells<sup>56</sup>. NO efficiently kills *G. intestinalis* trophozoites and the main  
331 scavenger enzyme for NO in *G. intestinalis* is Flavohemoprotein<sup>57</sup>, which is lacking in *G.*  
332 *muris* (Table 2). Arginine is an important modulator of virulence in many infectious  
333 organisms since it interferes with NO production<sup>58</sup>. *G. muris* encodes arginases which  
334 converts arginine directly to ornithine and urea. Arginases are present in *G. intestinalis*  
335 GS and *T. vaginalis*, representing an ancestral acquisition in Metamonada followed by  
336 subsequent losses in *Spironucleus* and *G. intestinalis* assemblage A and E (Table 2 and  
337 Fig. S8D).

338 We noticed that several of the bacterial derived genes that are shared with *G.*  
339 *intestinalis* GS are clustered together on the chromosomes in *G. muris* in highly dynamic  
340 genomic regions. For example, arginase genes are found in a four-gene genomic region  
341 that is present in two adjacent copies in chromosome 2, two on chromosome 1 and one on

342 chromosome 5 (dark grey filled arrows, Fig. 4A). Intact arginase genes are only found on  
343 chromosome 2 adjacent to the genes encoding 2,5-diketo-D-gluconic acid reductase. All  
344 the duplication events have occurred between ARPs (red arrows) and NEKs (dark red  
345 arrows). The homologous regions on the three chromosomes likely originated via two  
346 duplication events.

347 Nucleotide substitutions have accumulated since the duplication events and in-  
348 frame stop codons (marked by red asterisk in Fig. 4A) have rendered three of the arginase  
349 genes pseudogenized. The small ORFs sitting at the other side of arginase are hypothetical  
350 proteins and have similar homologs in other parts of the genome, but the sequences of their  
351 duplicated homologs in those regions are pseudogenized (dotted light grey block in Fig.  
352 4A). Both genes have their closest relatives in bacteria, even though the genes can be  
353 found in other eukaryotes (Fig. S13E). Phylogenetic analyses indicate the genes might  
354 have been transferred from different bacterial donors multiple times into different  
355 eukaryotic lineages (Fig. S13E).

356 A second, distantly related 2,5-diketo-D-gluconic acid reductase gene copy (Fig.  
357 4B, Fig. S8F) in the genome is present in three different genomic locations together with  
358 two other enzymes, carboxymuconolactone decarboxylase (CMD) and ketosteroid  
359 isomerase-like protein. All three genes, constitute putative lateral gene transfers (Fig.  
360 S8GH). This three-gene region is close to  $\psi$ VSPs (orange arrows) and ARPs.

### 361 362 **Interaction with the intestinal microbiota**

363 *Giardia* trophozoites colonize the intestinal lumen where they can potentially  
364 interact with other intestinal microbes. Although little is functionally known about such  
365 interactions and their consequences for parasite survival, four proteins encoded in the *G.*  
366 *muris* genome could play a role in these interactions.



367 Bactericidal/permeability-increasing (BPI) proteins are innate immune defense  
368 proteins that bind to lipopolysaccharide and display potent killing activity against gram-  
369 negative bacteria by increasing membrane permeability. Beyond this basic function BPI  
370 proteins might also act as effectors in controlling mutualistic symbioses<sup>59</sup>. Homologs of  
371 BPI proteins are found in *G. muris* and *G. intestinalis*<sup>60</sup>, but it remains to be determined if  
372 they have anti-microbial activity.

373 *G. muris* encodes tryptophanase, an enzyme that metabolizes tryptophan to  
374 pyruvate with concomitant release of indole and ammonia. While pyruvate can be utilized  
375 in energy metabolism, indole and its metabolites have been shown to affect gut  
376 microbiota composition, possibly by interfering with quorum-sensing systems, and might  
377 be able to influence host health<sup>61</sup>. Phylogenetic analysis of this protein showed that this  
378 enzyme represents an ancestral acquisition in diplomonads with subsequent loss in *G.*  
379 *intestinalis* (Fig. S8I).

380 Two more proteins with potential importance for microbiota interactions are  
381 encoded in *G. muris*: Tae4 and quorum-quenching N-acyl-homoserine lactonase. The  
382 Tae4 proteins are wide-spread amidases that were first described in association with the  
383 T6SS system effector Tae4 in *Salmonella* Typhimurium<sup>62</sup>. The Tae4 proteins degrade  
384 bacterial peptidoglycan by hydrolyzing the amide bond,  $\gamma$ -D-glutamyl-mDAP (DL-bond)  
385 of Gram-negative bacteria<sup>62</sup>, and is required for interbacterial antagonism and successful  
386 gut colonization by *S. Typhimurium*<sup>63</sup>. Quorum-quenching N-acyl-homoserine lactonase  
387 degrades N-acyl-homoserine lactone, a molecule used by both Gram-positive and Gram-  
388 negative bacteria, for quorum sensing<sup>64</sup>. Our phylogenetic analysis supports the lateral  
389 acquisition of both genes (Fig. S8JK). While Tae4 has been a recent acquisition in *G.*  
390 *muris*, quorum-quenching N-acyl-homoserine lactonase was present in the common

391 ancestor of *G. muris* and *G. intestinalis* and lost in *G. intestinalis* WB and P15 (Fig.  
392 S8K).

### 393 **Discussion**

394 Our data shows that *G. muris* has an even more compact genome than *G. intestinalis*,  
395 whose genome is already known to be highly streamlined<sup>32</sup>. Genome compaction via  
396 reduction of mobile or repetitive elements have been seen in other eukaryotic  
397 parasites<sup>1,65</sup>. *G. muris* appears to fall into this category as it encodes no known classes  
398 of mobile elements and repetitive elements are mostly confined to telomeric contexts.  
399 The shortness of intergenic regions in *G. muris* ranks among the most extreme  
400 recorded for any eukaryote, even shorter than Microsporidia which are known as the  
401 most compact and reduced eukaryotic genomes<sup>66</sup>. The global synteny map of *G. muris*  
402 to *G. intestinalis* indicates many frequent small-scale genome rearrangements that  
403 often favors a more efficient gene packing in *G. muris* thus allowing shorter  
404 intergenic regions. This evidence of gene shuffling and the fact that there is very little  
405 evidence of genome degradation would argue for optimization of growth as the  
406 driving force of *G. muris* genome streamlining.

407 *G. muris* trophozoites have not been grown axenically *in vitro*, which has  
408 hampered exploration of its genome, gene regulation and metabolism<sup>5,21</sup>, and has  
409 limited the use of *G. muris* as an *in vitro* model system for the human parasite *G.*  
410 *intestinalis* and other intestinal protozoan parasites<sup>5</sup>. We identified several metabolic  
411 differences between *G. muris* and *G. intestinalis* that might indicate avenues to  
412 successful strain axenization. Most of these differences are represented by instances  
413 of lateral gene transfer of metabolic genes or losses thereof in either *G. intestinalis* or  
414 *G. muris*. *G. intestinalis* isolates are typically poor at infecting mice. Despite this, the  
415 assemblage B isolate GS, which shares more metabolic enzymes with *G. muris* than

416 the assemblage A isolate WB, is better able to establish infection in mice than WB.  
417 This suggests that the shared metabolic capacity of *G. muris* and *G. intestinalis* GS  
418 enables survival in the murine intestinal tract. Additionally, *G. muris* might be able to  
419 interact or interfere with intestinal Gram-positive and Gram-negative bacteria and this  
420 could be a key to establish successful infections. *G. intestinalis*, which lacks some of  
421 the putative microbiome modulators, such as Tryptophanase and Tae4, is dependent  
422 on reduction of the small intestinal microbiota in order to efficiently infect mice<sup>67</sup>. *G.*  
423 *muris* is cleared from the murine host by secretory IgA<sup>26</sup>, whereas the role of IgA in  
424 anti-giardial defense is less clear for *G. intestinalis* GS<sup>26,68</sup>. We speculate that *G.*  
425 *muris* is more resistant to elimination by innate factors such as competition with the  
426 normal microbiota, or host production of reactive oxygen species and/or NO, whereas  
427 GS is more sensitive to innate factors and eliminated much faster within 1-3 weeks  
428 (while *G. muris* clearance requires 4-8 weeks). Future insights into the importance of  
429 innate factors in *G. muris* infection should be facilitated by the availability of the  
430 complete genome sequence.

431 Sub-telomeric regions in parasitic protozoa often contain arrays of expanded  
432 gene families that are under positive selection by the immune system<sup>65</sup>. The relaxed  
433 evolutionary pressure offered by keeping pseudogenized copies of surface antigens  
434 might be an advantage for *G. muris* that allows genetic drift and recombination to  
435 drive rapid and stealthy diversification, thus avoiding elimination by adaptive immune  
436 defenses. It was previously reported that *G. muris* is capable of antigenic variation  
437 and encodes VSP genes with high similarity and conserved structural features  
438 (CRGKA pentapeptide) to those *G. intestinalis*<sup>69</sup>. We failed to identify close  
439 homologs to the previously sequenced *G. muris* VSPs in our *G. muris* genome. The  
440 linear  $\psi$ VSP arrays in *G. muris* have previously been described in *G. intestinalis*<sup>70</sup>.

441 Our phylogenetic analyses of *G. muris* VSPs and  $\psi$ VSPs revealed evidence of  
442 recombination or segmental gene conversion, as previously demonstrated in *G.*  
443 *intestinalis*<sup>70</sup>. However, we recognized two clear differences in the VSP repertoire in  
444 *G. muris* and *G. intestinalis*. First, *G. muris* encodes a low number of intact VSP loci  
445 that are located internally on the chromosomes. Second, the  $\psi$ VSP arrays are almost  
446 exclusively telomere adjacent, as opposed to *G. intestinalis* where this tendency is not  
447 apparent<sup>70</sup>. These aspects of the *G. muris* VSP repertoire resemble the antigenic  
448 variation systems of *Pneumocystis* spp. and *Trypanosoma brucei*<sup>71,72</sup>. Despite clear  
449 mechanistic differences, all these systems have converged on having large reservoirs  
450 of mostly telomeric positioned, arrayed genes that are transcriptionally silent and are  
451 sources for recombination and gene conversion into expression sites.

452 The function of ankyrin repeat proteins and NEK kinases remains mostly  
453 unknown. They represent, together with VSPs, the most dynamic protein families in  
454 the *Giardia* genomes<sup>50</sup>. The *Giardia* NEK kinases lack transmembrane domains and  
455 have been suggested to target and localize to different intracellular structures with  
456 their ankyrin repeats<sup>50</sup> and many of the *G. intestinalis* NEK kinases localize to  
457 cytoskeletal structures, including the flagella and adhesive disc<sup>9</sup>. Rearrangements and  
458 duplications in the *G. muris* genome are frequently associated with these large gene  
459 families (Fig. 2A and Fig. 4), indicating they might serve as anchoring-points for  
460 recombination.

461 Lateral gene transfer is an important shaping factor in the evolution of  
462 metabolism in protists<sup>73</sup>. The origins of laterally transferred genes in *G. muris* are here  
463 inferred to be by prokaryotic sources that are members of the gastrointestinal flora, in  
464 agreement to previous observations<sup>74</sup>. Most of the putative differences in metabolic  
465 potential in the *Giardia* genomes are attributable to lateral gene transfers, either by

466 lineage specific gene gain or loss. For example, the ability to utilize mannose has been  
467 introduced from bacteria of the genus *Alistipes* via lateral gene transfer. This event is  
468 supported by phylogenetic reconstruction, shows a high degree of sequence  
469 conservation (>70% at the amino acid level) and displays maintained gene order to  
470 the one seen in the closest related bacterial lineages (Figure S8B). Interestingly,  
471 several lateral gene transfers were found clustered in amplified areas of the *G. muris*  
472 chromosome. Curiously, *G. intestinalis* assemblage B also maintains clustered copies  
473 of arginase and 2,5-diketo-D-gluconic acid reductase, while these genes have both  
474 been lost in the *G. intestinalis* assemblage A and E lineages.

475         Anti-microbial peptides of several classes, such as defensins and trefoil-factor 3,  
476 are up-regulated in the small intestine of *G. muris* infected mice<sup>29</sup>. Secreted cysteine  
477 proteases from *G. intestinalis* have been shown to be able to degrade defensins<sup>12</sup>. We  
478 detected prominent expression of several cysteine proteases in *G. muris*. The protease  
479 with the highest expression is suggested to have a role in encystation and excystation<sup>54</sup>.  
480 Its *G. intestinalis* homolog is up-regulated and secreted during interactions with human  
481 intestinal epithelial cells<sup>8</sup> and it cleaves chemokines, tight junction proteins and  
482 defensins<sup>12,75</sup>. Thus, this is most likely also an important virulence factor in *G. muris*.

483         Our results from this study are summarized in a model of the evolution of  
484 *Giardia*'s virulence traits in Figure 5. A number of characters important for *Giardia*'s  
485 ability to infect the intestine of mammals are pre-parasitic inventions (such as  
486 modified mitochondria and differentiation into transmissive cysts, Fig. 5) and some  
487 are found in all diplomonad parasites (e.g. loss of metabolic functions, streamlined  
488 microtubular cytoskeleton, expansion of gene families like ankyrins and cysteine  
489 proteases and loss of introns, Fig. 5). *Giardia* specific innovations include the  
490 adhesive disc for attachment, VSPs and High Cysteine Membrane Proteins for

491 antigenic variation and mitosomes involved in Fe-S complex synthesis (Fig. 5).  
492 Whereas some are only found in *G. muris* (e.g. metabolic genes involved in  
493 microbiota interactions, Fig. 5), suggesting adaptation to the intestinal environment of  
494 mice. Our data shows that the environment in the host's intestine, most of all the  
495 immune system and the microbiota, apply selective pressure for changes in the  
496 genome, metabolic potential and the parasite surface proteome.

## 497 **Methods**

### 498 **Cell preparation and nucleic acid extraction.**

499  $4.5 \times 10^7$  muris trophozoites (day 7 post infection) were collected from small intestines  
500 of three C57 mice, washed once in PBS and pellet frozen at  $-80^\circ\text{C}$  (Biosample  
501 SAMN11231832). Viable cysts of *G. muris* isolate Roberts-Thomson passaged  
502 through mice were obtained from Waterborne Inc. These cysts had been purified from  
503 fecal material using Percoll and sucrose gradients (Biosample SAMN11231833).  
504 DNA and RNA were extracted from  $1 \times 10^7$  cysts using standard methods.  
505  $1 \times 10^8$  cysts were excysted according to the procedure in Feely et al.<sup>76</sup> (Biosample  
506 SAMN11231834). RNA was purified from cell material equivalent to  $1 \times 10^7$  cysts.  
507 DNA for long-read sequencing was prepared from the remaining cysts as described in  
508 Supplementary Methods.

### 509 **Sequencing, assembly and annotation**

510 Total genomic DNA was sequenced using both Illumina MiSeq and PacBio RS II  
511 sequencers. The stranded transcriptome mRNA and the miRNA libraries were  
512 sequenced with Illumina HiSeq 2000 system. The RNA samples extracted from  
513 excysted cells and cysts prior excystation were prepared using the TruSeq stranded  
514 mRNA sample preparation kit and sequenced by HiSeq 2500.  
515 PacBio long reads were assembled de novo using the SMRT Analysis (v2.3.0)  
516 pipeline. A detailed description of genome sequencing, assembly, annotation, synteny  
517 analyses and RNA-Seq is available in Supplementary Methods.

### 518 **Pathway analysis**

519 The metabolic pathways of *G. muris* and *G. intestinalis* WB were predicted with a  
520 combination of BlastKOALA<sup>77</sup> implemented in KEGG<sup>78</sup>, Pathway Tools v21.5<sup>79</sup> and  
521 GiardiaDB<sup>80</sup>. The different predictions were combined and manually curated under

522 Pathway Tools<sup>79</sup>. Pathway Tools function pathway hole filler<sup>81</sup> was used to further  
523 complete the pathway, and transport inference parser<sup>82</sup> was used to infer transport  
524 reaction(s) for transporters which were then verified with Conserved Domain  
525 databases<sup>83</sup>.

## 526 **Phylogenetic analysis**

527 *G. muris* sequences were used as queries to retrieve at least 5000 hits with e-value  
528 <0.001, using BLASTP against the nr database and the organism-specific proteomes.  
529 The datasets were aligned in the forward and reverse orientation using MAFFT  
530 v6.603b<sup>84</sup> and PROBCONS v1.12<sup>85</sup>. The four resulting alignments were combined  
531 with T-COFFEE<sup>86</sup> and trimmed by BMGE v1.12<sup>87</sup>. Maximum Likelihood (ML) trees  
532 were computed using IQtree v1.6.5<sup>88</sup> under LG4X substitution model<sup>89</sup>. Branch  
533 supports were assessed using ultrafast bootstrap approximation (UFboot)<sup>90</sup> with  
534 1,000 bootstrap replicates and 1,000 replicates for SH-like approximate likelihood  
535 ratio test (SH-aLRT)<sup>91</sup>. A detailed description of the phylogenetic analyses is  
536 available in Supplementary Methods.

537

538

## 539 **Figures**

540 **Figure 1. Circular representation of the *G. muris* chromosomes.** From outside  
541 inward: five chromosomes, GC percent, unique genes (grey) including unique  
542 metabolic genes in Table 2 (red), ARPs (greenblue) / NEKs (pink), VSPs (orange) /  
543  $\psi$ VSPs (blue) / HCMPs (purple), Coding percent / 5 kbp (green if  $\leq 0.5$ ), # SNPs /



544 kbp  $\geq$  5 (red), BLASTN matches with  $>95\%$  identity and  $> 1000$  bp in size. Circular  
545 plot was drawn with circlize<sup>92</sup>.

546 **Figure 2. Examples of synteny between *G. muris* and *G. intestinalis*.** A) A 50 kbp  
547 region on chromosome 3 which share synteny to a 58 kbp region on chromosome 5 in  
548 WB. Synteny plot was plotted using genoplots<sup>93</sup>. Shades of red and blue represent  
549 forward and inverted matches between orthologs. Genes are drawn as arrows in blue.  
550 ARPs in red, NEKs in dark red, and VSPs in orange. Dark grey filled genes are  
551 unique genes to that genome in comparison to the other. B) A 14 kbp region on  
552 chromosome 1 which shares synteny to a 16 kbp region on chromosome 5 in *G.*  
553 *intestinalis*. It uses the same color scheme as in A. C) Violin plots of intergenic sizes  
554 of neighboring positional orthologs of *G. muris* and *G. intestinalis*, and the grey  
555 vertical line represents the median intergenic size of *G. muris*. D) Violin plots of  
556 positional orthologs sizes of *G. muris* and *G. intestinalis*, and the grey vertical line  
557 represents the median ortholog size of *G. muris*. E) Histogram of the positional  
558 ortholog size difference between *G. muris* and *G. intestinalis*.

559 **Figure 3. Gene regulation and organization of VSPs in *G. muris*.** A) Promoter  
560 motifs shared by encystation-related genes. Motif 1 (gold in B) represents the general  
561 promoter motif positioned directly adjacent to the start codon. Motif 2 (teal in B)  
562 resembles the encystation-regulated promoter previously identified in *G. intestinalis*  
563 (52). B) The distribution and position of motif 1 (gold) and motif 2 (teal) in chosen  
564 genes regulated during encystation. C) *Giardia* cyst wall proteins. Cyst wall protein 3  
565 is missing in *G. muris*. Signal peptide (pink). Acidic LRR-domain (grey). C-terminal  
566 basic extension (green).

567 **Figure 4. Synteny plot of two duplicated regions in the genome.** A, B) Shades of  
568 red and blue represent forward and inverted matches between neighboring sequences.

569 ARPs are drawn in red, NEKs in dark red and VSPs in orange. Pseudogenized genes  
570 are drawn in dashed lines. Dark grey filled genes are unique genes to *G. muris* in  
571 comparison with *G. intestinalis*. Point mutation in arginase is marked in red asterisk.  
572 Homologous sequences that are not annotated in the genome are drawn in dashed box  
573 on sides of the backbone grey line. Genes discussed in the paper: 21985 and 21992  
574 encode the intact arginase genes, 21986 and 21992 encode the enzyme 2,5-diketo-D-  
575 gluconic acid reductase, whereas 21984 and 21994 are hypothetical proteins in A;  
576 14480 encodes 2,5-diketo-D-gluconic acid reductase, 24746 encodes CMD and 24745  
577 encodes ketosteroid isomerase-like protein in B.

578 **Figure 5. Model of the evolution of virulence traits in *Giardia* parasites.** A set of  
579 important diplomonad evolutionary innovations and their chronology is depicted at relevant  
580 phylogenetic nodes. A) Free-living fornicate ancestor. B) Diplomonad ancestor. C) *Giardia*  
581 ancestor. D) *Giardia muris*.

582

583 **Figure S1. A)** *G. muris* cells propagate as trophozoites in the mice small intestine.  
584 The cell trophozoites undergo encystation into cysts and are shed in the feces. The  
585 cysts are prompted to excyst as they encounter the conditions of the digestive tract.  
586 The excyzoites transition into the vegetative trophozoites. Cell material for genomic  
587 DNA was harvested from *G. muris* cysts from infected mice. **B)** Sub-telomeric  
588 regions in *G. muris*. Sequence motifs in the 10 unitigs terminating in (TAGGG)<sup>n</sup>  
589 telomeric sequences (purple). Ribosomal DNA sequences (black). Satellite-like  
590 repeated sequences (green).

591 **Figure S2. Chromosome-scale synteny between *G. muris* and *G. intestinalis* WB.**  
592 *G. muris* chromosomes are color coded. The links between the two genomes

593 representing sequence similarity identified by MUMmer promoter<sup>94</sup>, are colored after  
594 the *G. muris* chromosomal color. Circular plot was drawn with circlize<sup>92</sup>.  
595 **Figure S3. Sequence logo around start codon (A) and stop codon (B) in *G. muris*.**  
596 **C) *G. muris* gene expression from *in vivo* trophozoites.** Genes showing top-ranked  
597 FPKM ratios ( $\log_2$  (Trophs/Cysts)) between *in vivo* derived trophozoites and cysts  
598 (cut-off value  $\geq 4$ ). The value is indicated in the teal circle. An orange dot indicates  
599 that the ortholog of this gene is upregulated ( $>2$  fold) in *G. intestinalis* at 7 hrs, 12 hrs  
600 or 22 hrs into encystation<sup>39</sup>.

601 **Figure S4. *Trans*- and *cis*-introns in *G. muris*.** A) Aligned *trans*- and *cis*-splice  
602 junctions in *G. muris*. B) Splice-site associated motifs in *trans*-spliced exons. Base-  
603 pairing stems are underlined. Bases in red denote the predicted cleavage motif. C)  
604 Consensus alignment of the cleavage motifs in *G. muris*. D-E) Predicted secondary  
605 structures of D) *cis*-spliced and E) *trans*-spliced genes. The secondary structure was  
606 predicted using the mfold webserver using default settings and manually curated. GU-rich  
607 stretches and cleavage motifs are boxed.

608 **Figure S5. A) Conservation of the VSP C-terminal in *G. muris* and *G. intestinalis*.**  
609 Sequence logos of conserved motifs in the C-terminal of VSPs in *G. muris* (n=25)  
610 (upper panel) and *G. intestinalis* WB (n=183) (lower panel) were generated using  
611 MEME v5.0.5. Transmembrane and cytosolic pentapeptides were predicted by the  
612 Phobius webserver. B) **VSP and  $\psi$ VSP evolutionary dynamics.** A) The  $\psi$ VSP arrays  
613 (defined as  $>3$   $\psi$ VSP genes arrayed) in the *G. muris* genome arranged by  
614 chromosome, termini arranged to the right. Arrays of  $\psi$ VSPs without chromosomal  
615 context are shown below as orphan arrays. C) VSP cluster mostly together in a  
616 phylogeny whereas most  $\psi$ VSP gene arrays show relaxed clustering. Intact VSP  
617 genes are colored red, while  $\psi$ VSP genes are colored according to their resident

618  $\psi$ VSP array in panel A. Genes with black label are not found in arrays. **D)**

619 **Expression measurements of VSP and  $\psi$ VSP in *G. muris*.** VSP and  $\psi$ VSP RNA-  
620 seq read counts (FPKM) from trophozoites, cysts and excyzoites. Size of the circle  
621 corresponds to expression level.

622 **Figure S6. A) Phylogenetic tree of *G. muris* and *G. intestinalis* NEKs. B) Phylogenetic**  
623 **tree of *G. muris* and *G. intestinalis* ARPs. C) Network analysis of *G. muris* and *G.***  
624 ***intestinalis* NEKs and ARPs. *G. muris* genes are represented in circle whereas *G.***  
625 ***intestinalis* genes are shown in triangle. Blue indicates NEK and pink as ARP. Edges are**  
626 **weighted and scaled by reciprocal BLAST scores with evalue 1e-05 as the cutoff.**

627 **Figure S7. Phylogenetic tree of C1 family cysteine proteases in diplomonads. Black:**  
628 ***G. muris*, Red: *S. salmonicida*, Cyan: *G. intestinalis* GS/M, Green: *G. intestinalis* P15,**  
629 **Purple: *G. intestinalis* WB.**

630 **Figure S8. Phylogenetic analyses of HGT genes. A) Fructokinase. B) Mannose-6-**  
631 **phosphate isomerase. C) Transcriptional regulator/sugar kinase. D) Arginase. E) 2,5-**  
632 **diketo-D-gluconic acid reductase 1. F) 2,5-diketo-D-gluconic acid reductase 2. G)**  
633 **Carboxymuconolactone decarboxylase. H) Ketosteroid isomerase. I) Tryptophanase.**  
634 **J) Tae4. K) Quorum-quenching N-acyl-homoserine lactonase.**

635

636 **Supplementary Methods: Additional methods section**

637 **Declarations**

638 **Ethics approval and consent to participate**

639 All animal studies were approved by the Institutional Animal Care and Use

640 Committees of the University of California, San Diego, USA.

641 **Consent for publication**

642 No applicable.

643 **Availability of data and material**

644 Raw DNA and RNA sequence reads are archived at NCBI Sequence Read Archive

645 (SRA) under accession number SRR8858297 - SRR8858305.

646 This Whole Genome Shotgun project has been deposited at DDBJ/EMBL/GenBank

647 under the accession PRJNA524057. The version described in this paper is version

648 VDLU00000000.1. The datasets generated and analyzed in this project are also

649 available via GiardiaDB.

650 **Competing interests**

651 The authors declare that they have no competing interests.

652 **Funding**

653 The project was supported by funding from Vetenskapsrådet-M (2017-02918) to SGS.

654 LE was supported by NIH grant DK120515.

655 **Authors' contributions**

656 SGS, LE, JA and JJH conceived the study. JJH and EE performed RNA and DNA

657 extractions. FX assembled the genome. FX, AJG, JJH, AA, DP, JA, SGS and EE

658 annotated the genome. FX, JJH, AJG and SGS analyzed the data. All authors wrote

659 the paper.

660 **Acknowledgements**

661 Elaine Hanson is acknowledged for technical support performing trophozoite purifications

662 from infected mice.

663 Phylogenetic analyses were performed on resources provided by the Swedish National

664 Infrastructure for Computing (SNIC) at Uppsala Multidisciplinary Center for Advanced

665 Computational Science (UPPMAX).

666

667 **Tables and additional files**

668 **Tables**

669 **Table 1** - Comparison of genome content between *G. muris*, *G. intestinalis*, *S.*

670 *salmonicida* and *K. bialata*

671

| <b>Species</b>              | <b><i>G. muris</i></b>       | <b><i>G. intestinalis</i></b> | <b><i>S. salmonicida</i></b> | <b><i>K. bialata</i></b> |
|-----------------------------|------------------------------|-------------------------------|------------------------------|--------------------------|
| <b>Genome size (Mbp)</b>    | 9.8                          | 12.6                          | 12.9                         | 51.0                     |
| <b>Chromosomes</b>          | 5 (59)                       | 5 (35)                        | 9 (233)                      | ND                       |
| <b>(scaffolds)</b>          |                              |                               |                              | (11,564)                 |
| <b>G+C %</b>                | 54.7                         | 46.3                          | 33.4                         | 49.4                     |
| <b>Number of protein</b>    | 4653                         | 4963                          | 8067                         | 17,389                   |
| <b>encoding genes</b>       |                              |                               |                              |                          |
| <b>Mean / Median</b>        | 578 / 428                    | 635 / 457                     | 373                          | 333                      |
| <b>protein size (aa)</b>    |                              |                               |                              |                          |
| <b>*Mean / Median</b>       | 264 / 37                     | 470 / 81                      | 421                          | 597                      |
| <b>intergenic size (bp)</b> |                              |                               |                              |                          |
| <b>§Coding density %</b>    | 84.5 / 88.6                  | 81.5 / 84.7                   | 72.1                         | ND                       |
| <b>Number of introns</b>    | 3 <i>cis</i> ,5 <i>trans</i> | 8 <i>cis</i> ,5 <i>trans</i>  | 3 <i>cis</i>                 | 124,912                  |
| <b>tRNA genes</b>           | 68                           | 65                            | 145                          | ND                       |
| <b>ASH %</b>                | 0.016                        | 0.028                         | 0.15                         | ND                       |
| <b>References</b>           | This study                   | Ref <sup>32</sup>             | Ref <sup>95</sup>            | Ref <sup>91</sup>        |

672 \* Mean/Median intergenic distance is based on all RNAs (mRNAs, tRNAs, rRNAs),

673 but not pseudogenized genes.

674 § Coding density: First value is based on all RNAs (mRNAs, tRNAs, rRNAs), but not

675 pseudogenized genes; Second value is based on all RNAs including  $\psi$ VSP.

676

677 **Table 2** - Lateral gene transfers in *G. muris* (*Gm*), *G. intestinalis* (*Gi* WB, *Gi* GS, *Gi* P15),

678 *S. salmonicida* (*Ss*), *Treponomas spp.* (*Trep*), *K. bialata* (*Kb*) and *T. vaginalis* (*Tv*).

| Species                                             | <i>Gm</i> | <i>Gi</i><br><i>WB</i> | <i>Gi</i><br><i>GS</i> | <i>Gi</i><br><i>P15</i> | <i>Ss</i> | <i>Trep</i> | <i>Kb</i> | <i>Tv</i> |
|-----------------------------------------------------|-----------|------------------------|------------------------|-------------------------|-----------|-------------|-----------|-----------|
| <b>2.5-diketo-D-gluconic acid reductase</b>         | X         |                        | X                      |                         |           |             | X         | X         |
| <b>Arginase</b>                                     | X         |                        | X                      |                         |           |             |           | X         |
| <b>Carboxymuconolactone decarboxylase</b>           | X         |                        | X                      |                         |           |             |           |           |
| <b>Ferritin-like</b>                                | X         |                        |                        |                         |           |             |           | X         |
| <b>Fructokinase</b>                                 | X         |                        |                        |                         |           |             |           |           |
| <b>Ketosteroid isomerase</b>                        | X         |                        |                        |                         |           |             |           |           |
| <b>L-ascorbate-6-phosphate lactonase</b>            | X         |                        | X                      |                         |           |             |           |           |
| <b>Maltose-O-acetyltransferase</b>                  | X         |                        |                        |                         | X         | X           |           |           |
| <b>Mannose-6-phosphate isomerase</b>                | X         |                        |                        |                         | X         |             |           |           |
| <b>Phosphopantothenate-cysteine ligase</b>          | X         |                        |                        |                         | X         |             |           |           |
| <b>Quorum-quenching N-acyl-homoserine lactonase</b> | X         |                        | X                      |                         |           |             |           |           |
| <b>Ribonuclease 3</b>                               | X         |                        |                        |                         |           |             | X         | X         |
| <b>Tae4</b>                                         | X         |                        |                        |                         |           |             |           |           |
| <b>Tryptophanase</b>                                | X         |                        |                        |                         | X         | X           |           |           |
| <b>β-phosphoglucomutase</b>                         |           | X                      | X                      | X                       | X         | X           |           |           |
| <b>Extracellular nuclease</b>                       |           | X                      | X                      | X                       | X         | X           | X         | X         |

|                                        |   |   |   |   |   |   |   |
|----------------------------------------|---|---|---|---|---|---|---|
| <b>Flavoheмоprotein</b>                | X | X | X |   |   |   |   |
| <b>Glycerol kinase</b>                 | X | X | X | X | X |   |   |
| <b>Inositol-3-phosphate synthase</b>   | X | X | X |   |   |   |   |
| <b>Methyltransferase</b>               | X | X | X |   |   |   |   |
| <b>NADPH-ferrihemoprotein</b>          | X | X | X | X | X |   |   |
| <b>Purine nucleoside phosphorylase</b> | X | X | X | X | X | X | X |
| <b>Pyruvate phosphate dikinase</b>     | X | X | X |   | X |   |   |
| <b>Sugar/H<sup>+</sup> symporter</b>   | X | X | X |   |   |   |   |
| <b>Threonine dehydratase</b>           | X | X | X | X | X |   |   |

679

680 **Table 3** – Summaries of gene families within *Giardia*

|              | <i>G. intestinalis</i> * | <i>G. muris</i> * |
|--------------|--------------------------|-------------------|
| <b>NEK</b>   | 184 (26)                 | 216 (23)          |
| <b>ARP-1</b> | 269 (5)                  | 298 (6)           |
| <b>ARP-2</b> | 33                       | 86 (16)           |
| <b>ARP-3</b> | 8                        | 33                |
| <b>VSP</b>   | 133                      | 26                |
| <b>ψVSP</b>  | 208                      | 239               |

681 \* Values in () indicate the number of pseudogenized copies.

682 **Table 4** – Arrangement of VSP genes in the *G. muris* genome.

| Chr | Geneid 1 | Geneid 2 | Arrangement | Gene size (aa) | Distance (bp) | Genes in between |
|-----|----------|----------|-------------|----------------|---------------|------------------|
| 1   | 20512    | 13275    | -> <-       | 596            | 2025          | ψARP-2           |



|   |       |                            |       |     |                          |                       |
|---|-------|----------------------------|-------|-----|--------------------------|-----------------------|
| 1 | 21145 | 21149                      | -> <- | 594 | 1658                     | ψARP-2                |
| 1 | 13124 | 21374                      | -> <- | 620 | 8400                     | ψARP-2, alpha-tubulin |
| 2 | 16008 | 21957                      | <- -> | 624 | 8794                     | NEK, ARP-2            |
| 2 | 22301 | 22304                      | -> <- | 523 | 1656                     | ψARP-2                |
| 2 | 12920 | 22758<br>(22764,<br>22769) | <- -> | 515 | 10612<br>(6824,<br>8428) | NEK, TRP, Zinc        |
| 4 | 24220 | 24228                      | -> <- | 623 | 8303                     | ψARP-2, alpha-tubulin |
| 5 | 24787 | 24792                      | <- -> | 619 | 7158                     | NEK, Zinc, ARP-2      |

683

684 **Table S1 A)** One-to-one ortholog list between *G. muris* and *G. intestinalis* WB. Orthologs  
685 inferred by OrthoMCL. **B)** RNA-Seq expression values in excel file. Sorted according to  
686 FPKM values. **C)** VSP and ψVSP gene metadata. '-' in the pentapeptide motif represents  
687 lack of the 3' end sequence. **D)** List of ventral disc proteins in *G. muris*. **E)** Proteases  
688 detected in *G. muris* and *G. intestinalis*. **F)** Detailed information about hits of unique genes  
689 in *G. muris*.

## References

1. Poulin, R. & Randhawa, H. S. Evolution of parasitism along convergent lines: from ecology to genomics. *Parasitology* **142**, S6–S15 (2015).
2. Hupalo, D. N., Bradic, M. & Carlton, J. M. The impact of genomics on population genetics of parasitic diseases. *Current Opinion in Microbiology* **23**, 49–54 (2015).
3. Jackson, A. P. *et al.* Kinetoplastid Phylogenomics Reveals the Evolutionary Innovations Associated with the Origins of Parasitism. *Current Biology* **26**, 161–172 (2016).
4. Einarsson, E., Ma'ayeh, S. & Svärd, S. G. An up-date on *Giardia* and giardiasis. *Current Opinion in Microbiology* **34**, 47–52 (2016).
5. Cacciò, S. M., Lalle, M. & Svärd, S. G. Host specificity in the *Giardia duodenalis* species complex. *Infect. Genet. Evol.* **66**, 335–345 (2018).
6. Fink, M. Y. & Singer, S. M. The Intersection of Immune Responses, Microbiota, and Pathogenesis in Giardiasis. *Trends in Parasitology* **33**, 901–913 (2017).
7. Ma'ayeh, S. Y. *et al.* Responses of the Differentiated Intestinal Epithelial Cell Line Caco-2 to Infection With the *Giardia intestinalis* GS Isolate. *Front Cell Infect Microbiol* **8**, 244 (2018).
8. Ma'ayeh, S. Y. *et al.* Characterization of the *Giardia intestinalis* secretome during interaction with human intestinal epithelial cells: The impact on host cells. *PLoS Negl Trop Dis* **11**, e0006120 (2017).
9. Nosala, C., Hagen, K. D. & Dawson, S. C. 'Disc-o-Fever': Getting Down with *Giardia*'s Groovy Microtubule Organelle. *Trends in Cell Biology* **28**, 99–112 (2018).

10. Nosala, C. & Dawson, S. C. The Critical Role of the Cytoskeleton in the Pathogenesis of *Giardia*. *Current Clinical Microbiology Reports* **2**, 155–162 (2015).
11. McNally, S. G. & Dawson, S. C. Eight unique basal bodies in the multi-flagellated diplomonad *Giardia lamblia*. *Cilia* **5**, (2016).
12. Liu, J. *et al.* Secreted *Giardia intestinalis* cysteine proteases disrupt intestinal epithelial cell junctional complexes and degrade chemokines. *Virulence* **9**, 879–894 (2018).
13. Ortega-Pierres, G. *et al.* Giardipain-1, a protease secreted by *Giardia duodenalis* trophozoites, causes junctional, barrier and apoptotic damage in epithelial cell monolayers. *International Journal for Parasitology* **48**, 621–639 (2018).
14. Amat, C. B. *et al.* Cysteine Protease–Dependent Mucous Disruptions and Differential Mucin Gene Expression in *Giardia duodenalis* Infection. *The American Journal of Pathology* **187**, 2486–2498 (2017).
15. Cotton, J. A. *et al.* *Giardia duodenalis* Cathepsin B Proteases Degrade Intestinal Epithelial Interleukin-8 and Attenuate Interleukin-8-Induced Neutrophil Chemotaxis. *Infection and Immunity* **82**, 2772–2787 (2014).
16. Cotton, J. A. *et al.* *Giardia duodenalis* Infection Reduces Granulocyte Infiltration in an In Vivo Model of Bacterial Toxin-Induced Colitis and Attenuates Inflammation in Human Intestinal Tissue. *PLoS ONE* **9**, e109087 (2014).
17. Allain, T., Amat, C. B., Motta, J.-P., Manko, A. & Buret, A. G. Interactions of *Giardia* sp. with the intestinal barrier: Epithelium, mucus, and microbiota. *Tissue Barriers* **5**, e1274354 (2017).

18. Mendez, T. L. *et al.* Sphingolipids, Lipid Rafts, and Giardial Encystation: The Show Must Go On. *Current Tropical Medicine Reports* **2**, 136–143 (2015).
19. Stadelmann, B., Merino, M. C., Persson, L. & Svärd, S. G. Arginine Consumption by the Intestinal Parasite *Giardia intestinalis* Reduces Proliferation of Intestinal Epithelial Cells. *PLoS ONE* **7**, (2012).
20. Eckmann, L. *et al.* Nitric Oxide Production by Human Intestinal Epithelial Cells and Competition for Arginine as Potential Determinants of Host Defense Against the Lumen-Dwelling Pathogen *Giardia lamblia*. *The Journal of Immunology* **164**, 1478–1487 (2000).
21. Helmy, Y. A. *et al.* Occurrence and distribution of *Giardia* species in wild rodents in Germany. *Parasites & Vectors* **11**, (2018).
22. Friend, D. S. The fine structure of *Giardia muris*. *The Journal of Cell Biology* **29**, 317–332 (1966).
23. Dann, S. M., Le, C. H. Y., Hanson, E. M., Ross, M. C. & Eckmann, L. *Giardia* Infection of the Small Intestine Induces Chronic Colitis in Genetically Susceptible Hosts. *The Journal of Immunology* **201**, 548–559 (2018).
24. Holberton, D. V. Fine structure of the ventral disk apparatus and the mechanism of attachment in the flagellate *Giardia muris*. *J. Cell. Sci.* **13**, 11–41 (1973).
25. Schaefer, F. W., Rice, E. W. & Hoff, J. C. Factors promoting in vitro excystation of *Giardia muris* cysts. *Trans. R. Soc. Trop. Med. Hyg.* **78**, 795–800 (1984).
26. Langford, T. D. *et al.* Central importance of immunoglobulin A in host defense against *Giardia* spp. *Infect. Immun.* **70**, 11–18 (2002).

27. Davids, B. J. *et al.* Polymeric immunoglobulin receptor in intestinal immune defense against the lumen-dwelling protozoan parasite *Giardia*. *J. Immunol.* **177**, 6281–6290 (2006).
28. Dreesen, L. *et al.* *Giardia muris* infection in mice is associated with a protective interleukin 17A response and induction of peroxisome proliferator-activated receptor alpha. *Infect. Immun.* **82**, 3333–3340 (2014).
29. Manko, A. *et al.* *Giardia* co-infection promotes the secretion of antimicrobial peptides beta-defensin 2 and trefoil factor 3 and attenuates attaching and effacing bacteria-induced intestinal disease. *PLOS ONE* **12**, e0178647 (2017).
30. Saghaug, C. S. *et al.* Human Memory CD4+ T Cell Immune Responses against *Giardia lamblia*. *Clinical and Vaccine Immunology* **23**, 11–18 (2016).
31. Tanifuji, G. *et al.* The draft genome of *Kipferlia bialata* reveals reductive genome evolution in fornicate parasites. *PLOS ONE* **13**, e0194487 (2018).
32. Morrison, H. G. *et al.* Genomic minimalism in the early diverging intestinal parasite *Giardia lamblia*. *Science* **317**, 1921–1926 (2007).
33. Franzén, O. *et al.* Draft genome sequencing of giardia intestinalis assemblage B isolate GS: is human giardiasis caused by two different species? *PLoS Pathog.* **5**, e1000560 (2009).
34. Jerlström-Hultqvist, J. *et al.* Genome analysis and comparative genomics of a *Giardia intestinalis* assemblage E isolate. *BMC Genomics* **11**, 543 (2010).
35. Xu, F. *et al.* The Genome of *Spironucleus salmonicida* Highlights a Fish Pathogen Adapted to Fluctuating Environments. *PLoS Genetics* **10**, (2014).

36. Campbell, S. R., van Keulen, H., Erlandsen, S. L., Senturia, J. B. & Jarroll, E. L. *Giardia* sp.: Comparison of electrophoretic karyotypes. *Experimental Parasitology* **71**, 470–482 (1990).
37. Prabhu, A., Morrison, H. G., Martinez, C. R. & Adam, R. D. Characterisation of the subtelomeric regions of *Giardia lamblia* genome isolate WBC6. *Int. J. Parasitol.* **37**, 503–513 (2007).
38. Franzén, O. *et al.* Transcriptome Profiling of *Giardia intestinalis* Using Strand-specific RNA-Seq. *PLoS Computational Biology* **9**, e1003000 (2013).
39. Einarsson, E. *et al.* Coordinated Changes in Gene Expression Throughout Encystation of *Giardia intestinalis*. *PLOS Neglected Tropical Diseases* **10**, e0004571 (2016).
40. Morf, L. *et al.* The transcriptional response to encystation stimuli in *Giardia lamblia* is restricted to a small set of genes. *Eukaryotic Cell* **9**, 1566–1576 (2010).
41. Barash, N. R. *et al.* *Giardia* Colonizes and Encysts in High-Density Foci in the Murine Small Intestine. *mSphere* **2**, (2017).
42. Pham, J. K. *et al.* Transcriptomic Profiling of High-Density *Giardia* Foci Encysting in the Murine Proximal Intestine. *Frontiers in Cellular and Infection Microbiology* **7**, (2017).
43. Hudson, A. J. *et al.* Evolutionarily divergent spliceosomal snRNAs and a conserved non-coding RNA processing motif in *Giardia lamblia*. *Nucleic Acids Research* **40**, 10995–11008 (2012).

44. Kamikawa, R., Inagaki, Y., Tokoro, M., Roger, A. J. & Hashimoto, T. Split Introns in the Genome of *Giardia intestinalis* Are Excised by Spliceosome-Mediated trans-Splicing. *Current Biology* **21**, 311–315 (2011).
45. William Roy, S. Transcriptomic analysis of diplomonad parasites reveals a trans-spliced intron in a helicase gene in *Giardia*. *PeerJ* **5**, e2861 (2017).
46. Touz, M. C., Conrad, J. T. & Nash, T. E. A novel palmitoyl acyl transferase controls surface protein palmitoylation and cytotoxicity in *Giardia lamblia* VSP palmitoylation. *Molecular Microbiology* **58**, 999–1011 (2005).
47. Touz, M. C. *et al.* Arginine deiminase has multiple regulatory roles in the biology of *Giardia lamblia*. *Journal of Cell Science* **121**, 2930–2938 (2008).
48. Davids, B. J. *et al.* A new family of giardial cysteine-rich non-VSP protein genes and a novel cyst protein. *PLoS ONE* **1**, e44 (2006).
49. Ringqvist, E., Avesson, L., Söderbom, F. & Svärd, S. G. Transcriptional changes in *Giardia* during host-parasite interactions. *Int. J. Parasitol.* **41**, 277–285 (2011).
50. Manning, G. *et al.* The minimal kinome of *Giardia lamblia* illuminates early kinase evolution and unique parasite biology. *Genome Biology* **12**, R66 (2011).
51. Gargantini, P. R., Serradell, M. del C., Ríos, D. N., Tenaglia, A. H. & Luján, H. D. Antigenic variation in the intestinal parasite *Giardia lamblia*. *Current Opinion in Microbiology* **32**, 52–58 (2016).
52. Palm, J. E. D., Weiland, M. E.-L., Griffiths, W. J., Ljungström, I. & Svärd, S. G. Identification of immunoreactive proteins during acute human giardiasis. *J. Infect. Dis.* **187**, 1849–1859 (2003).

53. Liu, J., Svärd, S. G. & Klotz, C. *Giardia intestinalis* cystatin is a potent inhibitor of papain, parasite cysteine proteases and, to a lesser extent, human cathepsin B. *FEBS Letters* **593**, 1313–1325 (2019).
54. DuBois, K. N. *et al.* Identification of the major cysteine protease of *Giardia* and its role in encystation. *J. Biol. Chem.* **283**, 18024–18031 (2008).
55. Ansell, B. R. E. *et al.* Time-Dependent Transcriptional Changes in Axenic *Giardia duodenalis* Trophozoites. *PLoS Neglected Tropical Diseases* **9**, 1–24 (2015).
56. Stadelmann, B., Merino, M. C., Persson, L. & Svärd, S. G. Arginine Consumption by the Intestinal Parasite *Giardia intestinalis* Reduces Proliferation of Intestinal Epithelial Cells. *PLoS ONE* **7**, e45325 (2012).
57. Mastronicola, D. *et al.* Flavohemoglobin and nitric oxide detoxification in the human protozoan parasite *Giardia intestinalis*. *Biochem. Biophys. Res. Commun.* **399**, 654–658 (2010).
58. Das, P., Lahiri, A., Lahiri, A. & Chakravorty, D. Modulation of the arginase pathway in the context of microbial pathogenesis: A metabolic enzyme moonlighting as an immune modulator. *PLoS Pathogens* **6**, (2010).
59. Krasity, B. C., Troll, J. V., Weiss, J. P. & McFall-Ngai, M. J. LBP/BPI proteins and their relatives: conservation over evolution and roles in mutualism. *Biochemical Society Transactions* **39**, 1039–1044 (2011).
60. Ankarklev, J. *et al.* Comparative genomic analyses of freshly isolated *Giardia intestinalis* assemblage A isolates. *BMC Genomics* **16**, (2015).
61. Lee, J.-H., Wood, T. K. & Lee, J. Roles of Indole as an Interspecies and Interkingdom Signaling Molecule. *Trends in Microbiology* **23**, 707–718 (2015).



62. Russell, A. B. *et al.* A Widespread Bacterial Type VI Secretion Effector Superfamily Identified Using a Heuristic Approach. *Cell Host & Microbe* **11**, 538–549 (2012).
63. Sana, T. G. *et al.* *Salmonella* Typhimurium utilizes a T6SS-mediated antibacterial weapon to establish in the host gut. *Proceedings of the National Academy of Sciences* **113**, E5044–E5051 (2016).
64. Kim, M. H. *et al.* The molecular structure and catalytic mechanism of a quorum-quenching N-acyl-L-homoserine lactone hydrolase. *Proceedings of the National Academy of Sciences* **102**, 17606–17611 (2005).
65. Leckenby, A. & Hall, N. Genomic changes during evolution of animal parasitism in eukaryotes. *Current Opinion in Genetics & Development* **35**, 86–92 (2015).
66. Peyretaillade, E. *et al.* Exploiting the architecture and the features of the microsporidian genomes to investigate diversity and impact of these parasites on ecosystems. *Heredity (Edinb)* **114**, 441–449 (2015).
67. Singer, S. M. & Nash, T. E. The Role of Normal Flora in *Giardia lamblia* Infections in Mice. *The Journal of Infectious Diseases* **181**, 1510–1512 (2000).
68. Singer, S. M. & Nash, T. E. T-Cell-Dependent Control of Acute *Giardia lamblia* Infections in Mice. *Infection and Immunity* **68**, 170–175 (2000).
69. Ropolo, A. S., Saura, A., Carranza, P. G. & Lujan, H. D. Identification of Variant-Specific Surface Proteins in *Giardia muris* Trophozoites. *Infection and Immunity* **73**, 5208–5211 (2005).
70. Adam, R. D. *et al.* The *Giardia lamblia* vsp gene repertoire: characteristics, genomic organization, and evolution. *BMC Genomics* **11**, 424 (2010).

71. Schmid-Siegert, E. *et al.* Mechanisms of Surface Antigenic Variation in the Human Pathogenic Fungus *Pneumocystis jirovecii*. *mBio* **8**, (2017).
72. Mugnier, M. R., Stebbins, C. E. & Papavasiliou, F. N. Masters of Disguise: Antigenic Variation and the VSG Coat in *Trypanosoma brucei*. *PLoS Pathog.* **12**, e1005784 (2016).
73. Husnik, F. & McCutcheon, J. P. Functional horizontal gene transfer from bacteria to eukaryotes. *Nature Reviews Microbiology* **16**, 67–79 (2018).
74. Alsmark, C. *et al.* Patterns of prokaryotic lateral gene transfers affecting parasitic microbial eukaryotes. *Genome Biology* **14**, R19 (2013).
75. Liu, J., Fu, Z., Hellman, L. & Svärd, S. G. Cleavage specificity of recombinant *Giardia intestinalis* cysteine proteases: Degradation of immunoglobulins and defensins. *Molecular and Biochemical Parasitology* **227**, 29–38 (2019).
76. Feely, D. E., Gardner, M. D. & Hardin, E. L. Excystation of *Giardia muris* induced by a phosphate-bicarbonate medium: localization of acid phosphatase. *J. Parasitol.* **77**, 441–448 (1991).
77. Kanehisa, M., Sato, Y. & Morishima, K. BlastKOALA and GhostKOALA: KEGG Tools for Functional Characterization of Genome and Metagenome Sequences. *Journal of Molecular Biology* **428**, 726–731 (2016).
78. Kanehisa, M., Furumichi, M., Tanabe, M., Sato, Y. & Morishima, K. KEGG: new perspectives on genomes, pathways, diseases and drugs. *Nucleic Acids Research* **45**, D353–D361 (2017).
79. Karp, P. D. *et al.* Pathway Tools version 19.0 update: software for pathway/genome informatics and systems biology. *Briefings in Bioinformatics* **17**, 877–890 (2016).

80. Aurrecochea, C. *et al.* GiardiaDB and TrichDB: integrated genomic resources for the eukaryotic protist pathogens *Giardia lamblia* and *Trichomonas vaginalis*. *Nucleic Acids Research* **37**, D526–D530 (2009).
81. Green, M. L. & Karp, P. D. A Bayesian method for identifying missing enzymes in predicted metabolic pathway databases. *BMC Bioinformatics* **5**, 76 (2004).
82. Lee, T. J., Paulsen, I. & Karp, P. Annotation-based inference of transporter function. *Bioinformatics* **24**, i259-267 (2008).
83. Marchler-Bauer, A. & Bryant, S. H. CD-Search: protein domain annotations on the fly. *Nucleic Acids Res.* **32**, W327-331 (2004).
84. Katoh, K., Misawa, K., Kuma, K. & Miyata, T. MAFFT: a novel method for rapid multiple sequence alignment based on fast Fourier transform. *Nucleic acids research* **30**, 3059–3066 (2002).
85. Do, C. B., Mahabhashyam, M. S. P., Brudno, M. & Batzoglou, S. ProbCons: Probabilistic consistency-based multiple sequence alignment. *Genome research* **15**, 330–40 (2005).
86. Notredame, C., Higgins, D. G. & Heringa, J. T-Coffee: A novel method for fast and accurate multiple sequence alignment. *J. Mol. Biol.* **302**, 205–217 (2000).
87. Criscuolo, A. & Gribaldo, S. BMGE (Block Mapping and Gathering with Entropy): a new software for selection of phylogenetic informative regions from multiple sequence alignments. *BMC Evol. Biol.* **10**, 210 (2010).
88. Nguyen, L.-T., Schmidt, H. A., von Haeseler, A. & Minh, B. Q. IQ-TREE: A Fast and Effective Stochastic Algorithm for Estimating Maximum-Likelihood Phylogenies. *Molecular Biology and Evolution* **32**, 268–274 (2015).

89. Kalyaanamoorthy, S., Minh, B. Q., Wong, T. K. F., von Haeseler, A. & Jermini, L. S. ModelFinder: fast model selection for accurate phylogenetic estimates. *Nature Methods* **14**, 587 (2017).
90. Hoang, D. T., Chernomor, O., von Haeseler, A., Minh, B. Q. & Vinh, L. S. UFBoot2: Improving the Ultrafast Bootstrap Approximation. *Molecular Biology and Evolution* **35**, 518–522 (2018).
91. Guindon, S. *et al.* New Algorithms and Methods to Estimate Maximum-Likelihood Phylogenies: Assessing the Performance of PhyML 3.0. *Systematic Biology* **59**, 307–321 (2010).
92. Gu, Z., Gu, L., Eils, R., Schlesner, M. & Brors, B. circlize implements and enhances circular visualization in R. *Bioinformatics* **30**, 2811–2812 (2014).
93. Guy, L., Kultima, J. R. & Andersson, S. G. E. genoPlotR: comparative gene and genome visualization in R. *Bioinformatics* **26**, 2334–2335 (2010).
94. Kurtz, S. *et al.* Versatile and open software for comparing large genomes. *Genome Biol.* **5**, R12 (2004).
95. Xu, F. *et al.* The Genome of *Spironucleus salmonicida* Highlights a Fish Pathogen Adapted to Fluctuating Environments. *PLOS Genetics* **10**, e1004053 (2014).

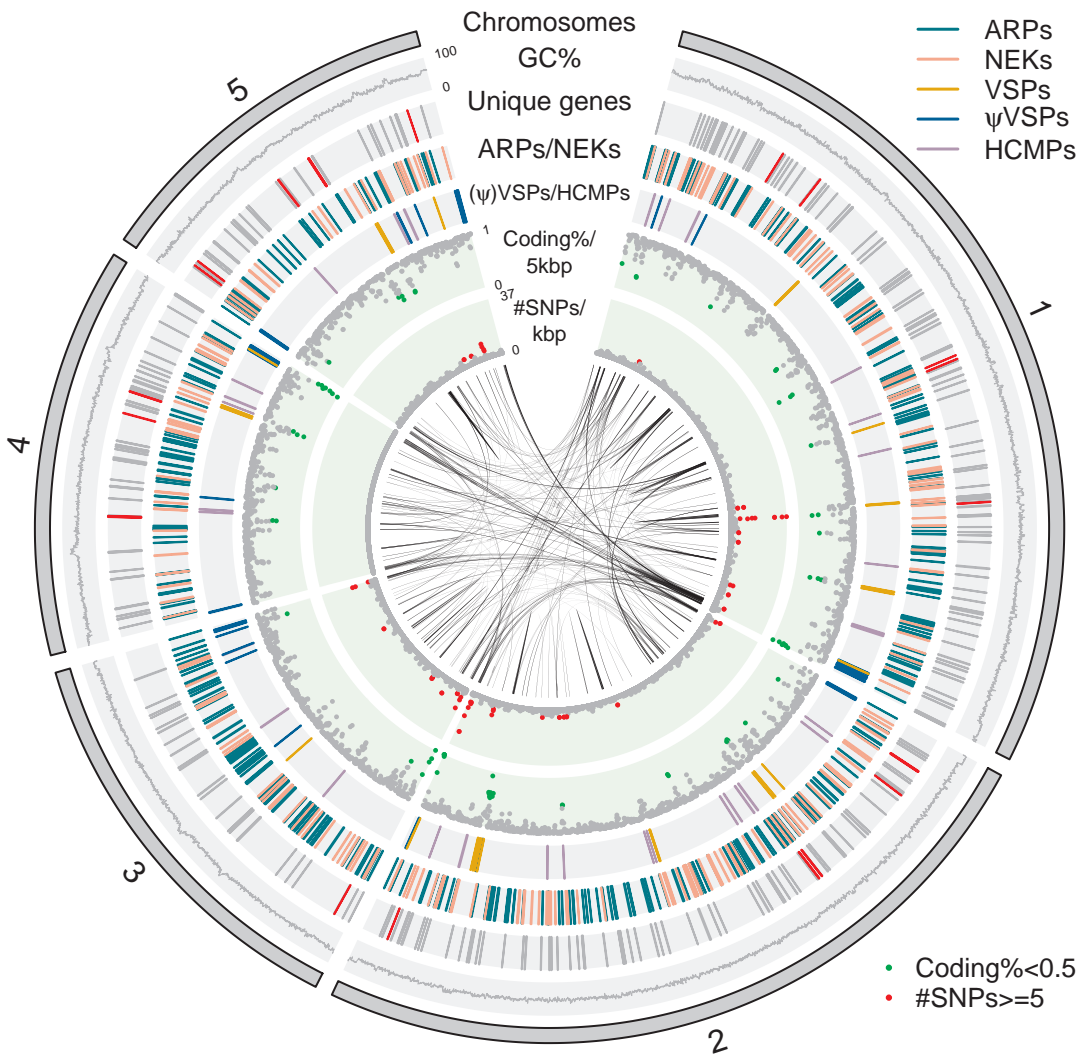

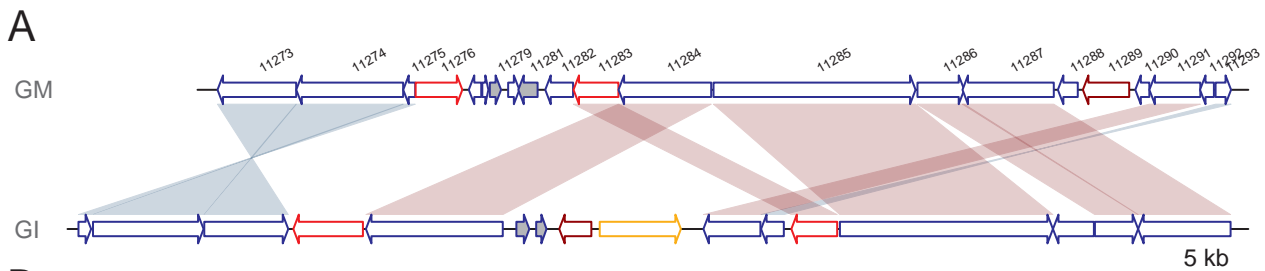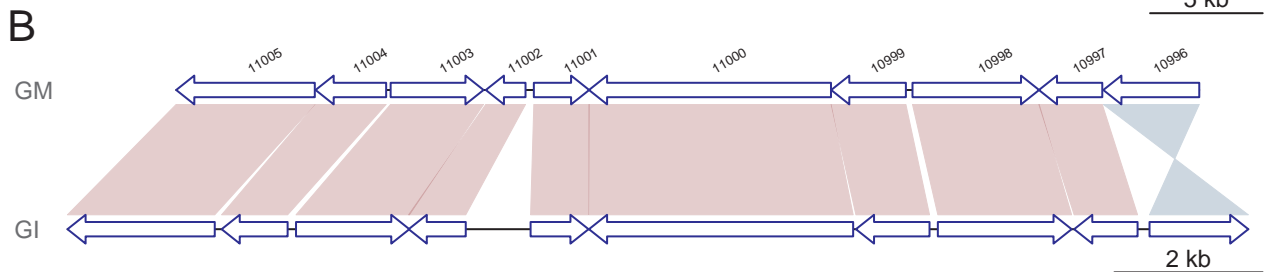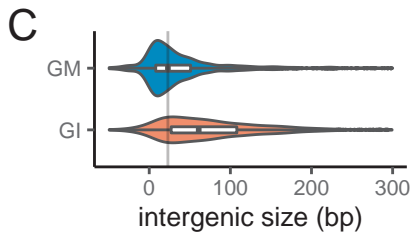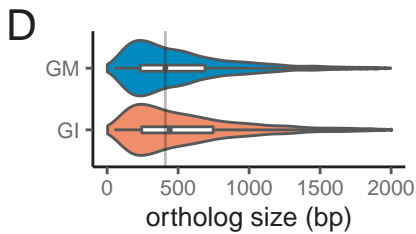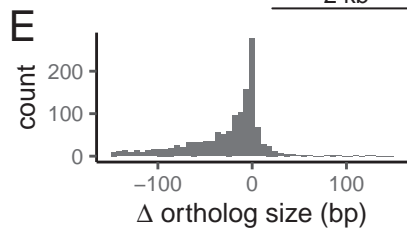

### A Motif 1: General promoter motif

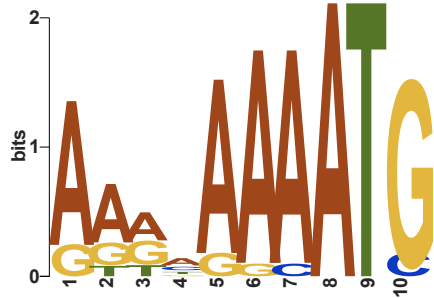

### Motif 2: Encystation box

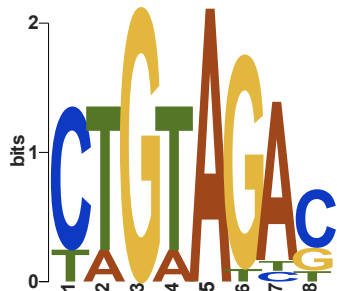

### B

#### Gene

|            |                                           |
|------------|-------------------------------------------|
| GMRT_13204 | Cyst Wall Protein 2                       |
| GMRT_10774 | Cyst Wall Protein 1                       |
| GMRT_13400 | TMP-1 protein                             |
| GMRT_13283 | SacB                                      |
| GMRT_15542 | Oxidoreductase                            |
| GMRT_10283 | Synaptic glycoprotein SC2                 |
| GMRT_11019 | MYB                                       |
| GMRT_14284 | Hypothetical protein                      |
| GMRT_15202 | UDP-N-acetylglucosamine pyrophosphorylase |

Up reg  
(log<sub>2</sub>)

Promoter motifs

■ Motif 1  
■ Motif 2

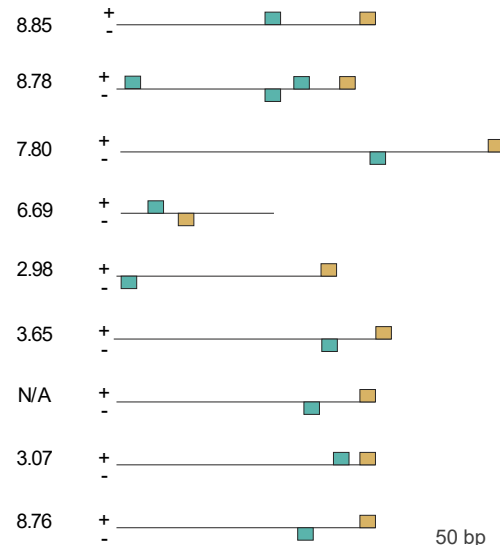

### C

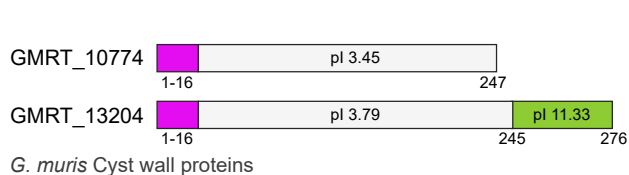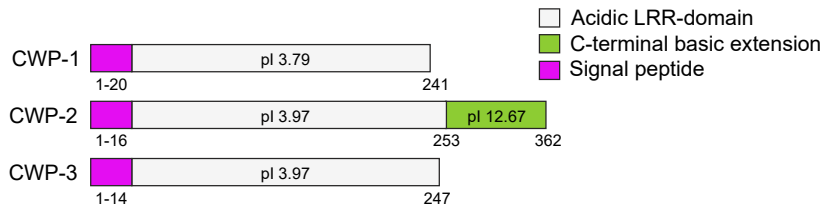

□ Acidic LRR-domain  
■ C-terminal basic extension  
■ Signal peptide

**A**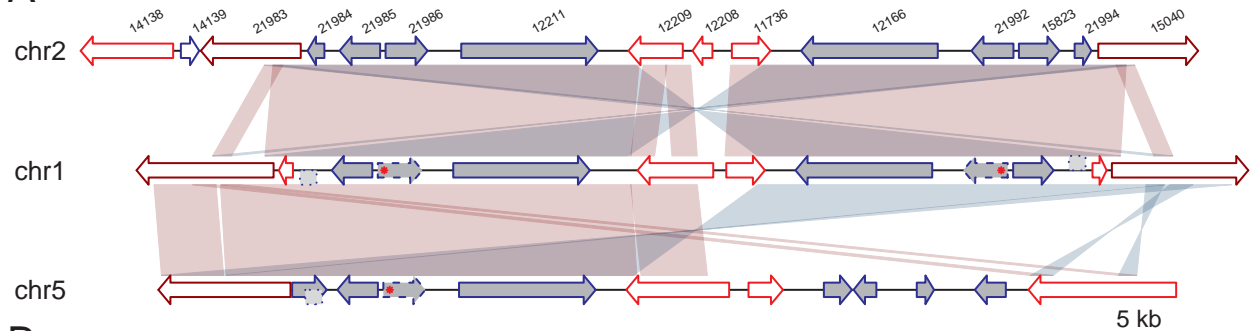**B**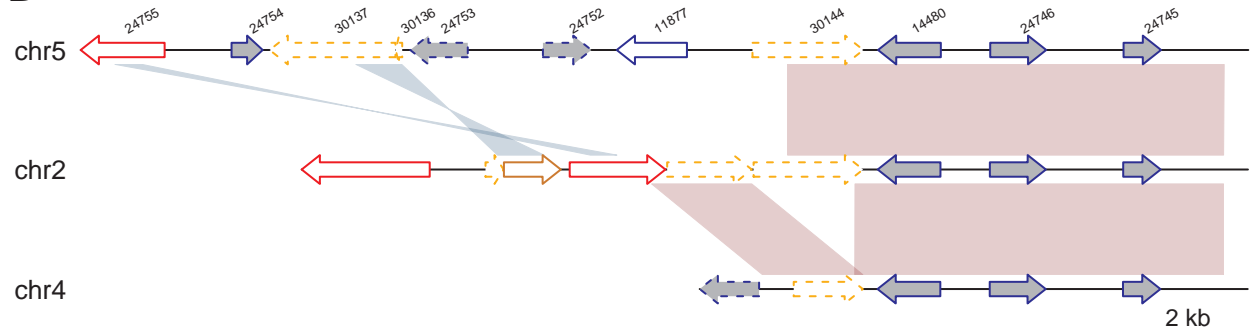



## Diplomonad adaptations

Metabolic adaptation : gene loss / gain via HGT

Cysteine-rich gene families

Heavy intron loss

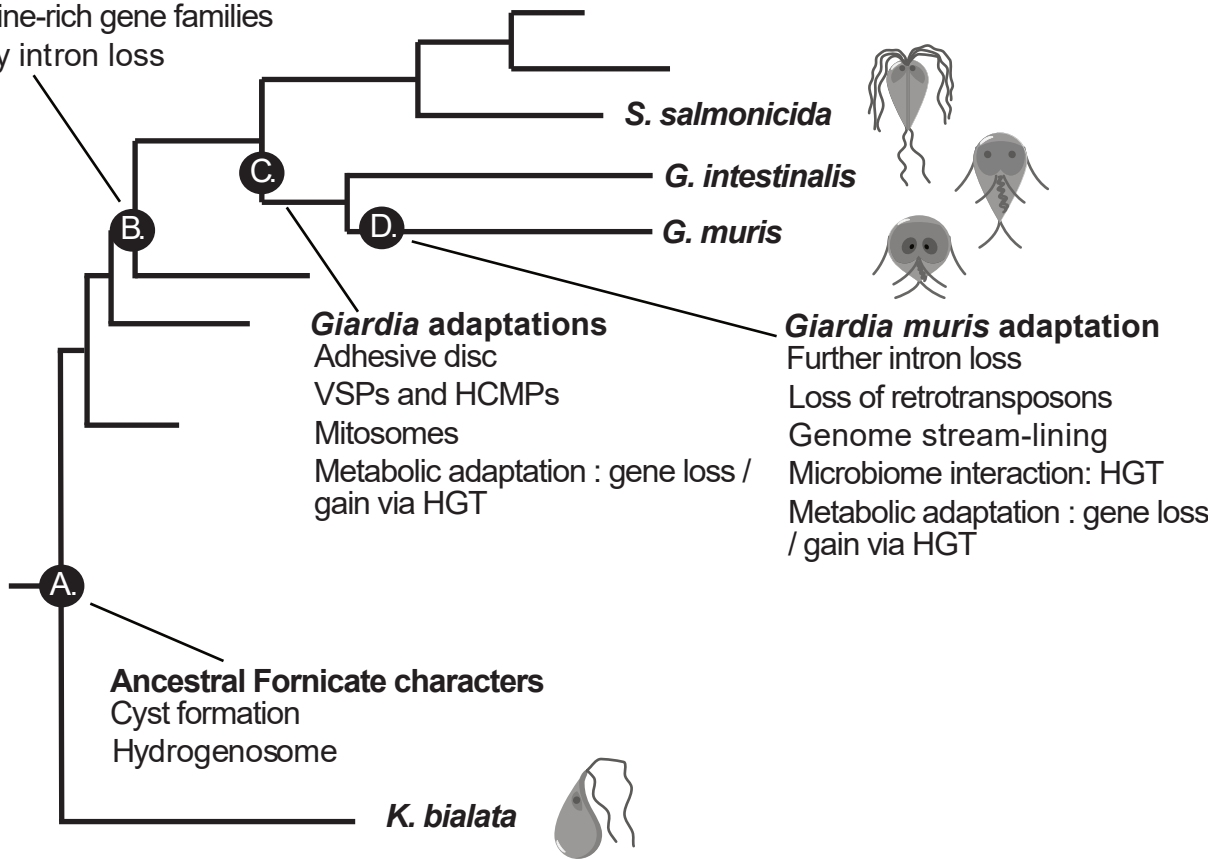

Source: https://www.biorxiv.org/content/10.1101/870949v1.full.pdf
